# Supplementary material
Source: PubMed Central journal article supplement (PMC8447036)
Supplement: POPS-42-845-s001.pdf [file POPS-42-845-s001.pdf]

**Supplementary Information of "United We Stand, Divided We Fall: Socio-Political Predictors of Physical Distancing and Hand Hygiene during the COVID-19 Pandemic".**

1. Attrition analyses
2. Supplementary Table 1 and Supplementary Table 2
3. Detailed material

## 1. Attrition analyses

Compared to participants who participated in both waves, people lost to follow up had greater hand hygiene before COVID-19 ( $M_{\text{attrited}} = 0.11$ ,  $SD = 0.77$ ;  $M_{\text{retained}} = -0.45$ ,  $SD = 0.68$ ;  $t$  [3028] = 5.88,  $p < .001$ ), perceived greater risk to their health ( $M_{\text{attrited}} = 3.99$ ,  $SD = 3.82$ ;  $M_{\text{retained}} = 3.82$ ,  $SD = 1.46$ ;  $t$  [3028] = 3.19,  $p = .001$ ), and perceived Australians as having less positive social interactions ( $M_{\text{attrited}} = 4.58$ ;  $SD = 0.99$ ;  $M_{\text{retained}} = 4.71$ ,  $SD = 0.99$ ,  $t$  [3027] = 3.36,  $p = .001$ ; ; with a Bonferroni correction for 23 comparisons, significance set at  $p < .002$ ).

## 2. Supplementary Table 1 and Supplementary Table 2

Table 1

*Descriptive statistics and correlations with local variables of interest*

|                                             | W1 <i>M (SD)</i> | W2<br><i>M</i> | 1       | 2       | 3       | 4       | 5       | 6       | 7       | 8       | 9      | 10      |
|---------------------------------------------|------------------|----------------|---------|---------|---------|---------|---------|---------|---------|---------|--------|---------|
| 1. Standardized physical distancing         | 0.00 (0.63)      | 0.00           | -       | .18***  | .00     | .00     | .00     | -.01    | -0.02   | -0.01   | -0.01  | 0.02    |
| 2. Standardized hand hygiene                | 0.00 (0.72)      | 0.00           | .14***  | -       | .04*    | .05*    | .01     | .01     | .06**   | .08***  | -.04*  | .06**   |
| 3. SR: Helpful                              | 5.05 (1.46)      | 4.96           | .12***  | .11***  | -       | .79***  | .38***  | .52***  | .56***  | .64***  | .61*** | .25***  |
| 4. SR: Trustworthy                          | 4.83 (1.43)      | 4.81           | .09***  | .11***  | .76***  | -       | .46***  | .56***  | .60***  | .67***  | .62*** | .26***  |
| 5. SR: Safe                                 | 4.53 (1.65)      | 4.53           | .02     | -.02    | .35***  | .41***  | -       | .44***  | .49***  | .49***  | .34*** | .13***  |
| 6. SR: Rules                                | 5.16 (1.32)      | 5.11           | .11***  | .08***  | .49***  | .54***  | .40***  | -       | .65***  | .63***  | .44*** | .31***  |
| 7. SR: Positive ethnic relations            | 4.83 (1.21)      | 4.79           | .09***  | .12***  | .49***  | .54***  | .43***  | .63***  | -       | .80***  | .47*** | .27***  |
| 8. SR: Collective problem solving           | 4.76 (1.22)      | 4.73           | .09***  | .15***  | .61***  | .63***  | .43***  | .62***  | .73***  | -       | .55*** | .28***  |
| 9. SR: Positive social relations            | 4.61 (1.12)      | 4.55           | .14***  | .10***  | .60***  | .60***  | .29***  | .42***  | .43***  | .55***  | -      | .19***  |
| 10. Conf. in the state government           | 4.71 (1.51)      | 4.55           | .05*    | .13***  | .23***  | .26***  | .13***  | .26***  | .23***  | .24***  | .17*** | -       |
| 11. Identification with neighbourhood       | 4.81 (1.66)      | 4.70           | .11**   | .18***  | .44***  | .41***  | .17***  | .32***  | .35***  | .42***  | .36*** | .05*    |
| 12. Political orientation W1                | 4.00 (1.29)      | -              | -.09*** | .04*    | .07***  | .07***  | .01     | .05*    | .01     | .06**   | .01    | .13***  |
| 13. Age                                     | 47.77 (17.60)    | -              | .30***  | .04     | .16***  | .13***  | .02     | .14***  | .06***  | .10***  | .20*** | .28***  |
| 14. Weekly income                           | 7.79 (3.70)      | -              | -.07*** | -.02    | .02     | .04*    | .12***  | .04*    | .03     | .04*    | .01    | .23***  |
| 15. Sex                                     | -                | -              | 0.01    | .13***  | .01     | .00     | -.14*** | -.01    | .01     | .01     | .04    | .26***  |
| 16. Tested COVID Self                       | -                | -              | .23***  | -.08*** | .03     | .00     | -.02    | 0       | .00     | .00     | .09*** | .13***  |
| 17. Tested COVID Other                      | -                | -              | .15***  | -.04*   | .03     | .00     | .00     | .01     | .01     | -.01    | .07**  | .26***  |
| 18. Subjective health W1                    | 2.41 (0.97)      | -              | .11***  | -.05**  | -.11*** | -.13*** | -.10*** | -.13*** | -.15*** | -.11*** | -.07** | .23***  |
| 19. Risk perception W1                      | 4.09 (1.58)      | -              | .04     | .17***  | -0.04   | .00     | -.01    | -.05*   | -.04    | -.01    | .00    | -.07*** |
| 20. Self-efficacy of physical distancing W1 | 7.18 (3.91)      | -              | .13***  | .17***  | .01     | .02     | -.01    | .00     | .02     | .01     | .02    | .01     |
| 21. Self-efficacy of hand hygiene W1        | 8.99 (3.56)      | -              | .13***  | .28***  | .05*    | .04     | .01     | .01     | .06**   | .06**   | .05*   | .05*    |
| 22. Born in Australia                       | -                | -              | -.02    | -.04    | -.01    | .00     | -.04    | -.02    | -0.02   | .00     | -.01   | .17***  |

*Notes.* SR= Social relations. For Born in Australia, 0 = No, 1 = Yes. Correlations between variables at W1 are above the diagonal and correlations at W2 are below the diagonal (except for control variables and political orientation which were only measures in W1). Instead of W1 measures, pre-Covid-19 measures are reported for -physical distance and hand hygiene-. W2 standard deviations are not reported as the multiple imputation process that does not estimate pooled SDs. \*  $p < .05$ , \*\*  $p < .01$ , \*\*\*  $p < .001$ .

Table 1 (cont.)

*Descriptive statistics and correlations with local variables of interest*

|                                             | 11      | 12      | 13      | 14      | 15      | 16      | 17      | 18      | 19      | 20      | 21      | 22      |
|---------------------------------------------|---------|---------|---------|---------|---------|---------|---------|---------|---------|---------|---------|---------|
| 1. Standardized physical distance           | -.02    | .01     | .10***  | -.16*** | -.02    | .13***  | .09***  | .07***  | .02     | .06**   | .03     | -.03    |
| 2. Standardized hand hygiene                | .08***  | .12***  | -.15*** | -0.02   | .10***  | -.21*** | -.10*** | -.08*** | .17**   | .10**   | .17**   | -.02    |
| 3. SR: Helpful                              | .48***  | .06**   | .14***  | .05**   | .04*    | 0.01    | -.02    | -.14*** | -.01    | .03     | .06**   | .00     |
| 4. SR: Trustworthy                          | .47***  | .06**   | .04***  | .05**   | .00     | .00     | -.02    | -.16*** | -.01    | .03     | .05**   | -.02    |
| 5. SR: Safe                                 | .26***  | .04*    | .02     | .13***  | -.11*** | -.06**  | -.05**  | -.15*** | -.04    | -.02    | -.02    | -.06**  |
| 6. SR: Rules                                | .36***  | -.06**  | .11***  | .06**   | -.01    | .00     | -.01    | -.19*** | .00     | .05*    | .08***  | -.04*   |
| 7. SR: Positive ethnic relations            | .40***  | .02     | .04*    | .08***  | .00     | -.04*   | -.03    | -.18*** | -.01    | .05**   | .09***  | -.03    |
| 8. SR: Collective problem solving           | .47***  | .07***  | .08***  | .07***  | .02     | -.04*   | -.03    | -.15*** | .01     | .06**   | .08***  | -.04*   |
| 9. SR: Positive social relations            | .43***  | .01     | .18***  | .01     | .06**   | .08***  | .03     | -.13*** | -.10*** | .00     | .04*    | .01     |
| 10. Conf. in the state government           | .21***  | .03     | .04     | .02     | .04     | -.03    | -.01    | -.14*** | .09***  | .07***  | .08***  | -.08*** |
| 11. Identification with neighbourhood       | -       | .09***  | .12***  | .06***  | .02     | -.02    | -.04*   | -.18*** | -.03    | .00     | .03     | -.02    |
| 12. Political orientation W1                | .08***  | -       | .08***  | .10***  | -.11*** | -.10*** | -.06*** | -.05**  | .03     | -.02    | -.07*** | -.03    |
| 13. Age                                     | .14***  | .08***  | -       | -.01    | -.15*** | .16***  | .12***  | .18***  | -.17*** | .05**   | .02     | -.07*** |
| 14. Weekly income                           | 0.03    | .10***  | -.01    | -       | -.24*** | -.06*** | -.08*** | -.16*** | -.02    | .02     | -.02    | .03     |
| 15. Sex                                     | 0.04    | -.11*** | -.15*** | -.24*** | -       | .04*    | .05**   | -.02    | .02     | -.01    | .10***  | .02     |
| 16. Tested COVID Self                       | .00     | -.10*** | .16***  | -.06**  | .05*    | -       | .45***  | .08***  | -.07*** | -.07*** | .00     | .00     |
| 17. Tested COVID Other                      | .00     | -.06*** | .12***  | -.08*** | .05*    | .50***  | -       | .06**   | -.05*** | -.03    | .01     | -.01    |
| 18. Subjective health W1                    | -.13*** | -.06**  | .18***  | -.16*** | -.01    | .08***  | .06**   | -       | .04*    | .04*    | .00     | .04*    |
| 19. Risk perception W1                      | -.07*** | -.04*   | 0.03    | -.17*** | -.01    | .01     | -.07*** | -.05**  | -       | .13***  | .08***  | -.09*** |
| 20. Self-efficacy of physical distancing W1 | .05**   | .02     | -0.03   | .05**   | .02     | -.02    | -.07*** | -.03    | .04*    | -       | .62**   | -.01    |
| 21. Self-efficacy of hand hygiene W1        | .06**   | .02     | -.07*** | .02     | -.02    | .13***  | -.01    | .01     | .00     | -.08*** | -       | -.01    |
| 22. Born in Australia                       | -.01    | -.03    | -.07*** | .03     | .02     | -.01    | -.01    | .04*    | -.10*** | .01     | .01     | -       |

Notes. SR= Social relations. For Born in Australia, 0 = No, 1 = Yes. Correlations between variables at W1 are above the diagonal and correlations at W2 are below the diagonal (except for control variables and political orientation which were only measures in W1). Instead of W1 measures, pre-Covid-19 measures are reported for physical distance and hand hygiene. W2 standard deviations are not reported as the multiple imputation process that does not estimate pooled SDs. \*  $p < .05$ , \*\*  $p < .01$ , \*\*\*  $p < .001$ .

Table 2

*Descriptive statistics and correlations with national variables of interest*

|                                             | W1 <i>M</i><br>( <i>SD</i> ) | W2<br><i>M</i> | 1       | 2       | 3       | 4       | 5       | 6       | 7      | 8       | 9       | 10      |
|---------------------------------------------|------------------------------|----------------|---------|---------|---------|---------|---------|---------|--------|---------|---------|---------|
| 1. Standardized physical distance           | -                            | -              | -       | .18***  | -.01    | -.01    | -.02    | .00     | .00    | -.01    | .02     | .02     |
| 2. Standardized hand hygiene                | -                            | -              | .14***  | -       | .06**   | .037*   | .08***  | .04*    | .11*** | .07***  | -.10*** | .06**   |
| 3. SR: Helpful                              | 5.39 (1.20)                  | 5.24           | .14***  | .11***  | -       | .72***  | .30***  | .51***  | .51*** | .62***  | .50***  | .34***  |
| 4. SR: Trustworthy                          | 4.93 (1.23)                  | 4.86           | .05*    | .11***  | .71***  | -       | .44***  | .56***  | .62*** | .65***  | .54***  | .37***  |
| 5. SR: Safe                                 | 4.10 (1.54)                  | 4.13           | -.09*** | -.01    | .25***  | .42***  | -       | .40***  | .54*** | .46***  | .24***  | .20***  |
| 6. SR: Rules                                | 4.97 (1.25)                  |                | .05*    | .07***  | .48***  | .52***  | .36***  | -       | .65*** | .63***  | .41***  | .37***  |
| 7. SR: Positive ethnic relations            | 4.44 (1.19)                  | 4.42           | -.03    | .15***  | .47***  | .58***  | .50***  | .58***  | -      | .70***  | .39***  | .49***  |
| 8. SR: Collective problem solving           | 4.79 (1.15)                  | 4.70           | .04     | .12***  | .56***  | .59***  | .42***  | .61***  | .65*** | -       | .46***  | .36***  |
| 9. SR: Positive social relations            | 4.67 (0.98)                  | 4.57           | .12***  | .07***  | .51***  | .53***  | .22***  | .40***  | .36*** | .47***  | -       | .26***  |
| 10. Conf. in the national government        | 4.71 (1.58)                  | 4.51           | .07***  | .10***  | .25***  | .29***  | .16***  | .27***  | .39*** | .27***  | .20***  | -       |
| 11. Identification with neighbourhood       | 5.78 (1.55)                  | 5.6            | .18***  | .09***  | .35***  | .25***  | .01     | .20***  | .15*** | .22***  | .29***  | .10***  |
| 12. Political orientation W1                | -                            | -              | -.09*** | .04*    | .09***  | .10***  | .05*    | .04*    | .15*** | .04*    | .00     | .08***  |
| 13. Age                                     | -                            | -              | .30***  | .04     | .21***  | .10***  | -.10*** | .06**   | -.02   | .02     | .20***  | -.03    |
| 14. Weekly income                           | -                            | -              | -.07*** | -.02    | .02     | .06**   | .15***  | .05**   | .08*** | .06**   | .00     | .02     |
| 15. Sex                                     | -                            | -              | .01     | .13***  | .03     | -.02    | -.13*** | -.03    | -0.04  | .00     | .01     | .02     |
| 16. Tested COVID Self                       | -                            | -              | .23***  | -.08*** | .04     | -.03    | -.07*** | .00     | -.05*  | .01     | .08***  | -.09*** |
| 17. Tested COVID Other                      | -                            | -              | .15***  | -.04*   | .02     | -.01    | -.04    | .00     | -.02   | .02     | .06*    | -.07*** |
| 18. Subjective health W1                    | -                            | -              | .11***  | -.05**  | -.11*** | -.17*** | -.17*** | -.12*** | .03    | -.17*** | -.08**  | -.17*** |
| 19. Risk perception W1                      | -                            | -              | .04     | .17***  | -.02    | -.02    | -.03    | -.01    | .03    | -.01    | -.08**  | .07***  |
| 20. Self-efficacy of physical distancing W1 | -                            | -              | .13***  | .17***  | .01     | .01     | -.01    | .01     | .00    | .01     | .01     | .04*    |
| 21. Self-efficacy of hand hygiene W1        | -                            | -              | .13***  | .28***  | .04*    | .03     | -.04*   | .04     | .01    | .04     | .06**   | .04*    |
| 22. Born in Australia                       | -                            | -              | -.02    | -.04    | .01     | -.01    | -.06**  | -.03    | -.05** | -.02    | .02     | -.09*** |

*Notes.* SR= Social relations. For Born in Australia, 0 = No, 1 = Yes. Correlations between variables at W1 are above the diagonal and correlations at W2 are below the diagonal (except for control variables and political orientation which were only measures in W1). Instead of W1 measures, pre-Covid-19 measures are reported for physical distance and hand hygiene. W2 standard deviations are not reported as the multiple imputation process that does not estimate pooled SDs. \*  $p < .05$ , \*\*  $p < .01$ , \*\*\*  $p < .001$ .

Table 2 cont.

*Descriptive statistics and correlations with national variables of interest*

|                                           | 11      | 12      | 13      | 14      | 15      | 16      | 17      | 18      | 19      | 20      | 21      | 22      |
|-------------------------------------------|---------|---------|---------|---------|---------|---------|---------|---------|---------|---------|---------|---------|
| 1. Standardized physical distance         | -0.01   | .01     | .10***  | -.16*** | -.02    | .13***  | .09***  | .07***  | .02     | .06**   | .03     | -.03    |
| 2. Standardized hand hygiene              | -.04*   | .12***  | -.15*** | -0.02   | .10***  | -.21*** | -.10*** | -.08*** | .17**   | .10**   | .17**   | -.02    |
| 3. SR: Helpful                            | .36***  | .09***  | .16***  | .04*    | .03     | -0.01   | -0.01   | -.14*** | -.01    | .00     | .07***  | -.01    |
| 4. SR: Trustworthy                        | .29***  | .11***  | .09***  | .08***  | -.03    | -0.03   | -0.02   | -.18*** | -.01    | .00     | .04*    | -.04*   |
| 5. SR: Safe                               | .05**   | .06***  | -.11*** | .17***  | -.14*** | -.125** | -.08*** | -.19*** | -.03    | .00     | -.02    | -.09*** |
| 6. SR: Rules                              | .22***  | .08***  | .07***  | .05**   | -.01    | -0.03   | -0.03   | -.15*** | .01     | .02     | .07***  | -.03    |
| 7. SR: Positive ethnic relations          | .21***  | .17***  | .00     | .10***  | -.05**  | -.09*** | -.05**  | -.19*** | .04*    | .04*    | .03     | -.08*** |
| 8. SR: Collective problem solving         | .23***  | .07***  | 0.02    | .08***  | -.02    | -.04*   | -.04*   | -.19*** | .02     | .03     | .07***  | -.04*   |
| 9. SR: Positive social relations          | .28***  | .00     | .18***  | .00     | .01     | .11***  | .07***  | -.12*** | -.11*** | .00     | .06**   | .00     |
| 10. Conf. in the national government      | .17***  | 0.03    | .04*    | .02     | .04*    | -.03    | -0.01   | -.14*** | .09***  | .07***  | .08***  | -.08*** |
| 11. Identification with neighbourhood     | -       | .13***  | .21***  | .05**   | .00     | .03     | 0.02    | -.06**  | -.07*** | 0.02    | .04*    | .23***  |
| 12. Political orientation W1              | .07***  | -       | .08***  | .10***  | -.11*** | -.10*** | -.06*** | -.05**  | .03     | -.02    | -.07*** | -.03    |
| 13. Age                                   | .28***  | .08***  | -       | -.01    | -.15*** | .16***  | .12***  | .18***  | -.17*** | .05**   | .02     | -.07*** |
| 14. Weekly income                         | 0.01    | .10***  | -.01    | -       | -.24*** | -.06*** | -.08*** | -.16*** | -.02    | .02     | -.02    | .03     |
| 15. Sex                                   | .00     | -.11*** | -.15*** | -.24*** | -       | .04*    | .05**   | -.02    | .02     | -.01    | .10***  | .02     |
| 16. Tested COVID Self                     | .07***  | -.10*** | .16***  | -.06**  | .05*    | -       | .45***  | .08***  | -.07*** | -.07*** | .00     | .00     |
| 17. Tested COVID Other                    | .07***  | -.06*** | .12***  | -.08*** | .05*    | .50***  | -       | .06**   | -.05*** | -.03    | .01     | -.01    |
| 18. Subjective health W1                  | .00     | -.06**  | .18***  | -.16*** | -.01    | .08***  | .06**   | -       | .04*    | .04*    | .00     | .04*    |
| 19. Risk perception W1                    | -.09*** | -.04*   | .03     | -.17*** | -.01    | .01     | -.07*** | -.05**  | -       | .13***  | .08***  | -.09*** |
| 20. Self-efficacy of physical distance W1 | 0.01    | .02     | -.03    | .05**   | .02     | -.02    | -.07*** | -.03    | .04*    | -       | .62**   | -.01    |
| 21. Self-efficacy of hand hygiene W1      | 0.03    | .02     | -.07*** | .02     | -.02    | .13***  | -.01    | .01     | .00     | -.08*** | -       | -.01    |
| 22. Born in Australia                     | .14***  | -.03    | -.07*** | .03     | .02     | -.01    | -.01    | .04*    | -.10*** | .01     | .01     | -       |

*Notes.* SR= Social relations. For Born in Australia, 0 = No, 1 = Yes. Correlations between variables at W1 are above the diagonal and correlations at W2 are below the diagonal (except for control variables and political orientation which were only measures in W1). Instead of W1 measures, pre-Covid-19 measures are reported for physical distance and hand hygiene. W2 standard deviations are not reported as the multiple imputation process that does not estimate pooled SDs. \*  $p < .05$ , \*\*  $p < .01$ , \*\*\*  $p < .001$ .

## 2. Detailed material

### 2.1 Social relations

|                      |   |   |   |   |   |                   |
|----------------------|---|---|---|---|---|-------------------|
| 1                    | 2 | 3 | 4 | 5 | 6 | 7                 |
| Strongly<br>disagree |   |   |   |   |   | Strongly<br>agree |

---

#### **Social relations in Australia**

##### I think that in Australia ...

- ... people are willing to help others (HELPING)
- ... people trust each other (TRUST)
- ... people generally do not get along with each other (POSITIVE INTERACTIONS, recoded)
- ...people form a close-knit community (POSITIVE INTERACTIONS)
- ... people feel safe walking at night (SAFETY)
- ... people from different national or ethnic backgrounds get along well together (POSITIVE ETHNIC INTERACTIONS)
- ... people work together to solve problems (COLLECTIVE PROBLEM SOLVING)
- ... people have civil conversation with those who have different views to their own (COLLECTIVE PROBLEM SOLVING)
- ... people respect practices from other national or ethnic groups, even when they disagree with these practices (POSITIVE ETHNIC INTERACTIONS)
- ... people respect national rules and laws (FOLLOWING RULES)

#### **Social relations in the neighbourhood**

##### I think that in my neighbourhood ...

- ... people are willing to help others (HELPING)
- ... people trust each other (TRUST)
- ... people generally do not get along with each other (POSITIVE INTERACTIONS, recoded)
- ...people form a close-knit community (POSITIVE INTERACTIONS)
- ... people feel safe walking at night (SAFETY)
- ... people from different national or ethnic backgrounds get along well together (POSITIVE ETHNIC INTERACTIONS)
- ... people work together to solve problems (COLLECTIVE PROBLEM SOLVING)
- ... people have civil conversation with those who have different views to their own (COLLECTIVE PROBLEM SOLVING)

... people respect practices from other national or ethnic groups, even when they disagree with these practices (POSITIVE ETHNIC INTERACTIONS)

... people respect national rules and laws (FOLLOWING RULES)

## 2.2 Identification

|                   |   |   |   |   |   |                |
|-------------------|---|---|---|---|---|----------------|
| 1                 | 2 | 3 | 4 | 5 | 6 | 7              |
| Strongly disagree |   |   |   |   |   | Strongly agree |

---

### Identification with neighbourhood

I identify as a member of my neighbourhood

### Identification with Australians

I identify as Australian

I take pride in the Australian way of life and culture

I have a sense of belonging in Australia

## 2.3 Confidence in the government

|                   |   |   |   |   |   |                |
|-------------------|---|---|---|---|---|----------------|
| 1                 | 2 | 3 | 4 | 5 | 6 | 7              |
| Strongly disagree |   |   |   |   |   | Strongly agree |

---

### Confidence in the state government

I trust the way the **state** government communicates information

I trust the economic strategies of the **state** government

My faith in the **state** government is strong

### Confidence in the federal government

I trust the way the **federal** government communicates information

I trust the economic strategies of the **federal** government

My faith in the **federal** government is strong



## 2.4 Political orientation

What would best describe your political orientation?

|  |                   |              |             |        |              |               |                    |
|--|-------------------|--------------|-------------|--------|--------------|---------------|--------------------|
|  | 1                 | 2            | 3           | 4      | 5            | 6             | 7                  |
|  | Very left leaning | Left leaning | Centre left | Centre | Centre right | Right leaning | Very right leaning |

## 2.5 Physical distance

Select the percentage that best describes how often you do the following behaviours.

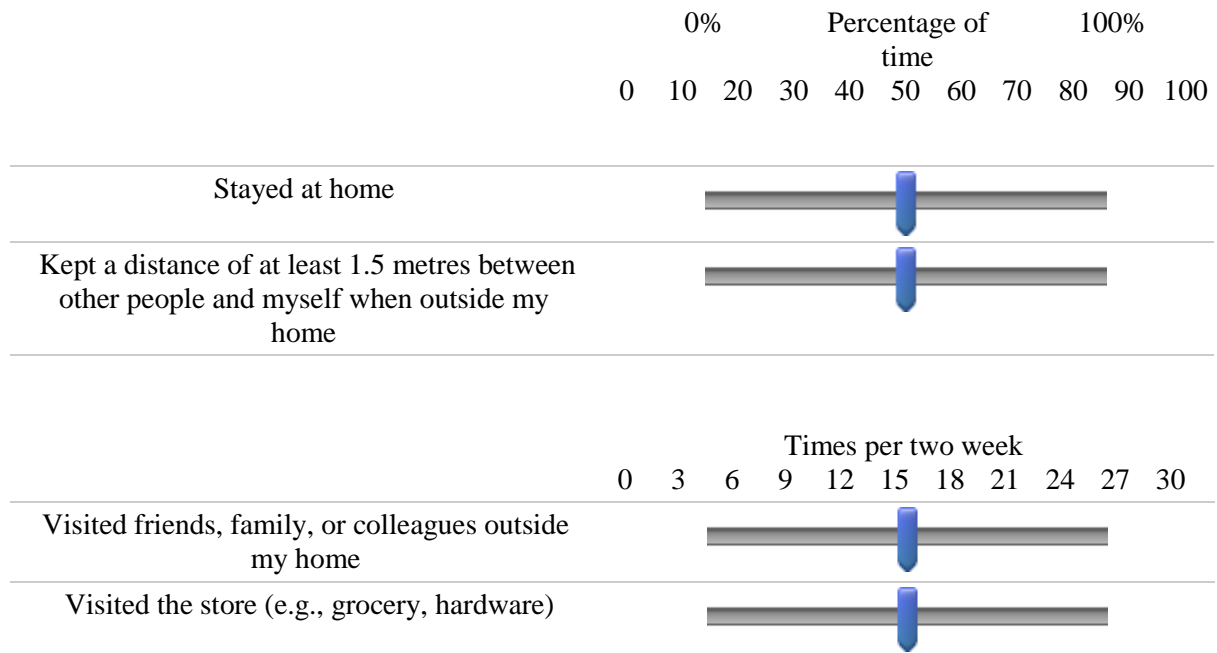

## 2.6 Hand hygiene

Select the percentage that best describes how often you do the following behaviours.

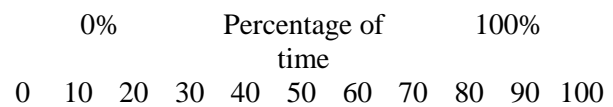

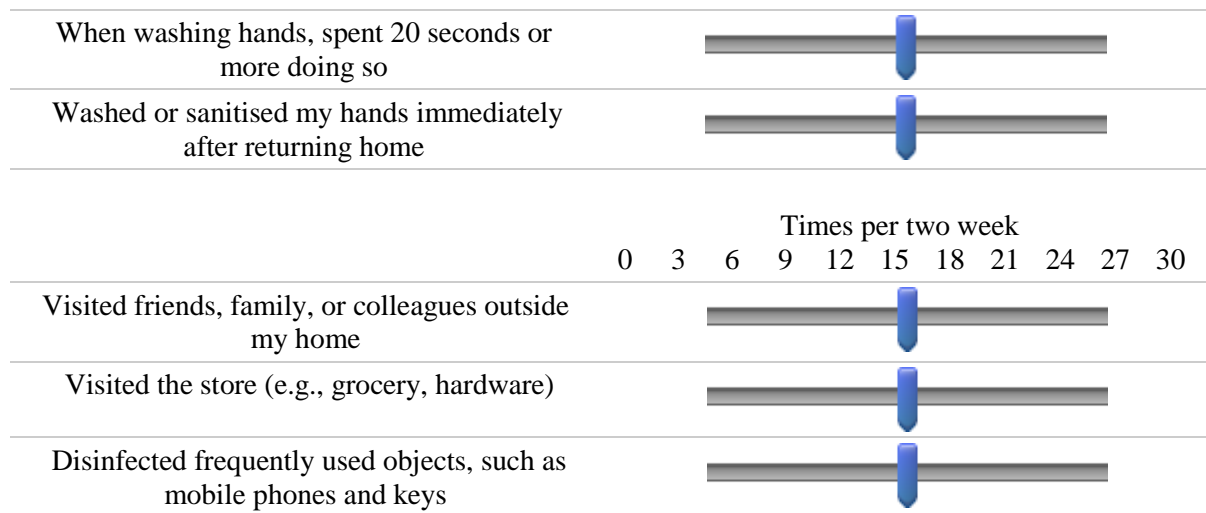

During **the last two weeks**, I washed my hands...

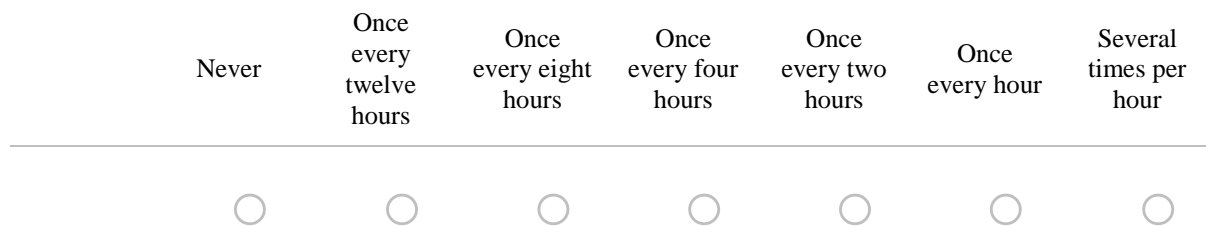

## 2.7 Health variables

### Subjective Health

In general, would you say your health is ...

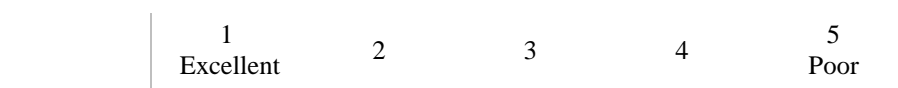

### Self-efficacy

With today as a starting point, if recommended by Health officials, for how many more months do you think you could engage with.....

... social distance measures? (0 to 12 months)

...current hygiene recommendations (0 to 12 months)

### Perceived risk

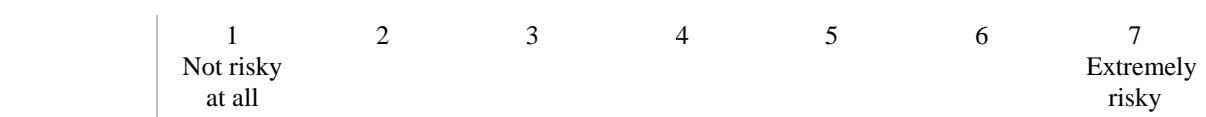

How **risky** do you think each of these activities would be for your own health?

Going for a walk with ...

- ... a family member living with me
- ... a family member who doesn't live with me
- ... a friend of the same ethnic group as me
- ... a friend of a different ethnic group
- ... a neighbour
- ... someone from another neighbourhood
- ... someone from my state
- ... someone from another state
- ... an Australian
- ... someone not from Australia

### **Tested COVID-19**

Have you tested positive for the Coronavirus (COVID-19), meaning that you (now or earlier) have had a medically confirmed case of this disease?

- Yes
- No

Has anyone you know well (friend, partner, family, colleague etc.) tested positive for the Coronavirus (COVID-19)?

- Yes (1)
- No (2)

### **2.8 Demographic questions**

What is your sex?

- Male
- Female
- Other

In what country were you born? [open ended question]

Consider your ancestry back as far as two generations (i.e. your parents and grandparents).

- Australian

- English
- Irish
- Chinese
- Scottish
- Italian
- German
- Indian
- Greek
- Dutch
- Other (please specify)

What is your individual WEEKLY income after income tax?

- Negative income
- Nil income
- \$1 - \$149 per week
- \$150 - \$299 per week
- \$300 - \$399 per week
- \$400 - \$499 per week
- \$500 - \$649 per week
- \$650 - \$799 per week
- \$800 - \$999 per week
- \$1,000 - \$1,249 per week
- \$1,250 - \$1,499 per week
- \$1,500 - \$1,749 per week
- \$1,750 - \$1,999 per week
- \$2,000 - \$2,999 per week
- \$3,000 or more
